# Supplementary material for: Molecular construction of HIV-gp120 discontinuous epitope mimics by assembly of cyclic peptides on an orthogonal alkyne functionalized TAC-scaffold
Source: Royal Society of Chemistry journal article supplement (doi:10.1039/c5ob02014j), 2015-11-05

Supporting information

## Molecular Construction of HIV-gp120 Discontinuous Epitope Mimics by Assembly of Cyclic Peptides on an Orthogonal Alkyne functionalized TAC-scaffold

P.R. Werkhoven,<sup>a</sup> M. Elwakiel,<sup>a</sup> T.J. Meuleman,<sup>a</sup> H.C. Quarles van Ufford,<sup>a</sup> J.A.W. Kruijtzera<sup>a</sup> and R.M.J. Liskamp<sup>\*a,b</sup>

<sup>a</sup> Division of Medicinal Chemistry & Chemical Biology, Utrecht Institute for Pharmaceutical Sciences, Department of Pharmaceutical Sciences, Faculty of Science, Utrecht University, P.O. Box 80082, 3508 TB Utrecht, The Netherlands

<sup>b</sup> School of Chemistry, Joseph Black Building, University of Glasgow, University Avenue, Glasgow, G12 8QQ, UK

R.M.J.Liskamp@uu.nl/Robert.liskamp@glasgow.ac.uk

### General information

Chemicals were obtained from commercial sources and used without further purification, unless stated otherwise. Peptide grade DiPEA, CH<sub>2</sub>Cl<sub>2</sub>, NMP, TFA and HPLC grade solvents were purchased from Biosolve B.V. (Valkenswaard, The Netherlands). Fmoc-protected amino acids and BOP were purchased from GL Biochem Ltd. (Shanghai, China). Used amino acids with side chain protecting groups were as follows: Fmoc-Arg(Pbf), Fmoc-Asp(OtBu), Fmoc-Cys(Trt), Fmoc-Gln(Trt), Fmoc-Glu(OtBu), Fmoc-His(Trt), Fmoc-Thr(tBu) and Fmoc-Trp(Boc). TentaGel S RAM resin (particle size 90µm, capacity 0.25 mmol/g) was purchased from Rapp Polymere GmbH (Tübingen, Germany). Solid phase peptide synthesis was performed on a C.S. Bio Co. peptide synthesizer (model CS336X).

Analytical HPLC was performed on a Shimadzu-10Avp (Class VP) system using a Phenomenex Gemini C18 column (110 Å, 5 µm, 250×4.60 mm) at a flow rate of 1 mL min<sup>-1</sup>. The used buffers were 0.1% trifluoroacetic acid in MeCN/H<sub>2</sub>O 5:95 (buffer A) and 0.1% trifluoroacetic acid in MeCN/H<sub>2</sub>O 95:5 (buffer B). Runs were performed by a standard protocol: 100% buffer A for 2 min, then a linear gradient of buffer B (0-100% in 48 min) and UV-absorption was measured at 214 and 254 nm.

ESI-TOF MS spectra were recorded on a microTOF mass spectrometer (Bruker). Samples were diluted with tuning mix (1:1, v/v) and infused at a speed of 300 µl/h using a nebulizer pressure of 5.8 psi, a dry gas flow of 3.0 L/min, a drying temperature of 180°C and a capillary voltage of 5.5 kV. Analytical LC-MS (electrospray ionization) was performed on Thermo- Finnigan LCQ Deca XP Max using same buffers and protocol as described for analytical HPLC. All reported mass values are monoisotopic.

## Analytical data for cyclic and linear peptides

### Synthesized peptides:

Cyclic peptide **16** (Ac-CLTRDGGKC-NH<sub>2</sub>) 69 mg (60 μmol) 34%, (21 steps, average 95% per step) Exact mass calculated [M + H]<sup>+</sup>: 1150.5250; ESI-TOF MS found: 1150.5263. Rt = 19.90 min

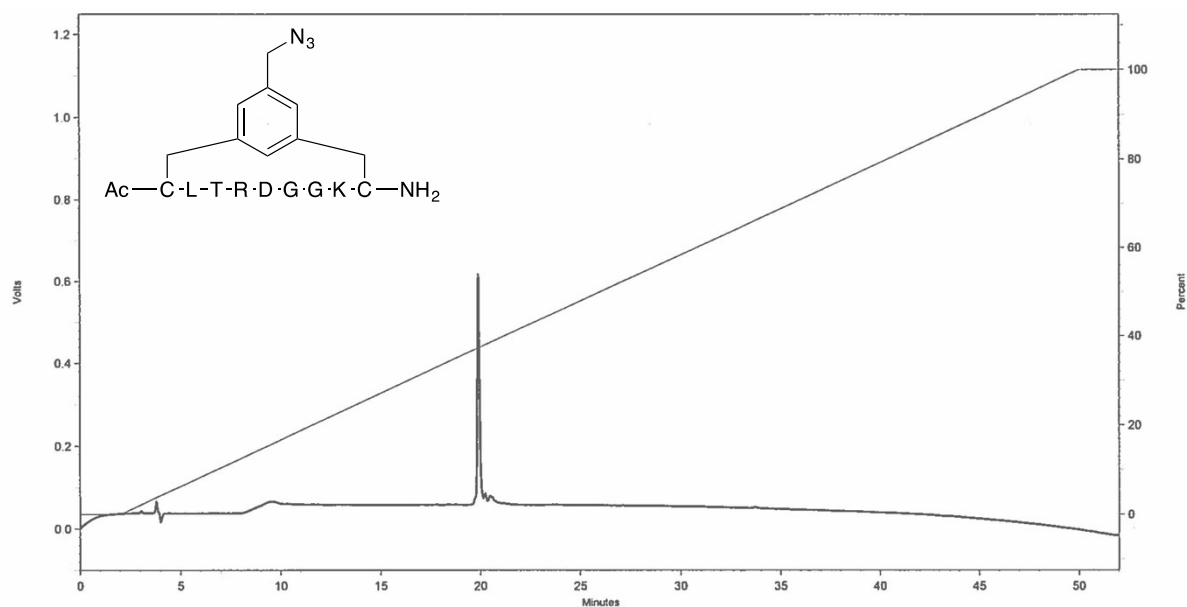

Cyclic peptide **17** (H-CINMWQEVGKAC-NH<sub>2</sub>): 65 mg (42 μmol) 17%, (26 steps, average 93% per step) Exact mass calculated [M + 2H]<sup>2+</sup>: 769.3472; ESI-TOF MS found: 769,3464. Rt = 22.05 min

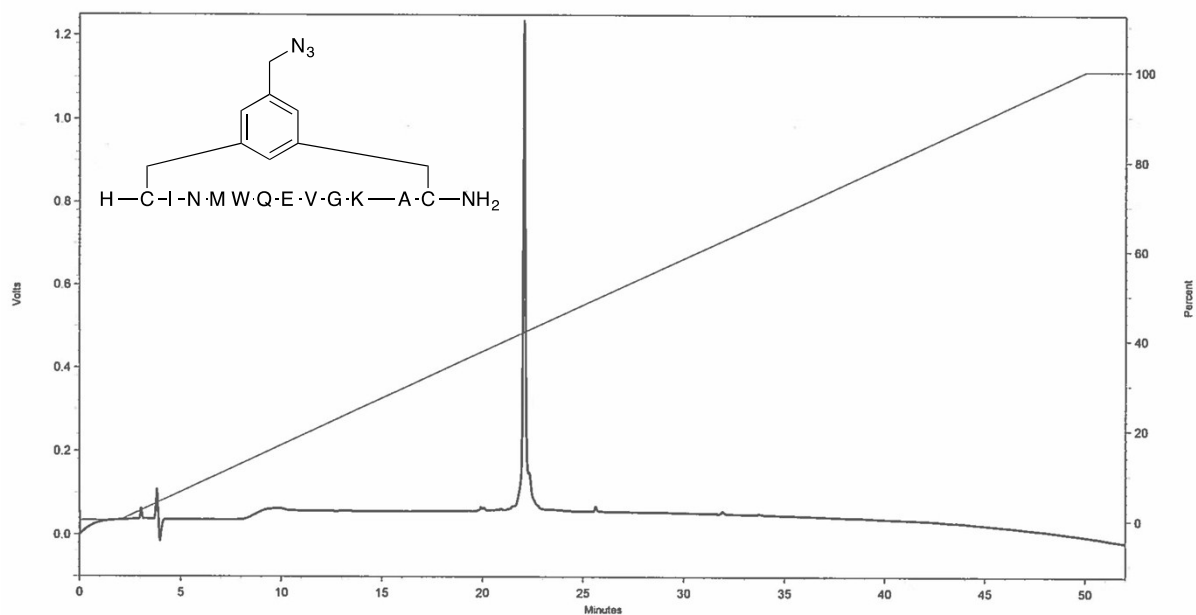

Cyclic peptide **18** (Ac-CSGGDPEIVTC-NH<sub>2</sub>) 92 mg (72 μmol) 29%, (25 steps, average 95% per step) Exact mass calculated [M + H]<sup>+</sup>: 1278.5247; ESI-TOF MS found: 1278.5269. Rt = 22.58 min

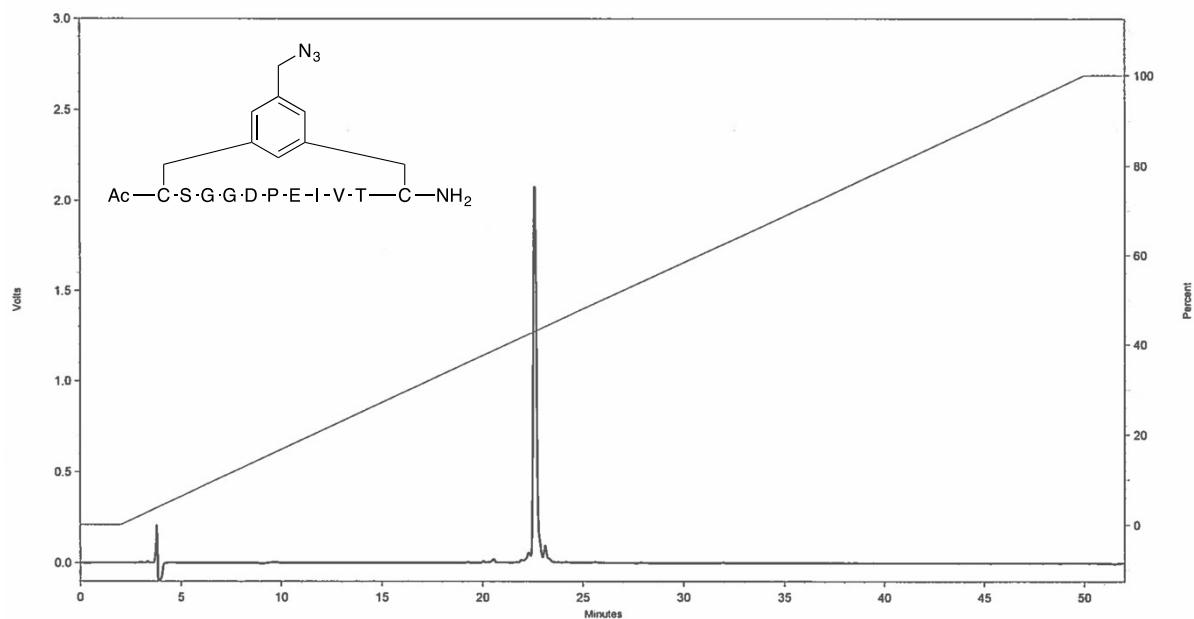

Linear peptide **19** (Ac-LTRDGGKC-NH<sub>2</sub>) 36 mg (34 μmol) 19%, (19 steps, average 92% per step) Exact mass calculated [M + H]<sup>+</sup>: 1035.5158; ESI-TOF MS found: 1035.5170. Rt = 20.19 min

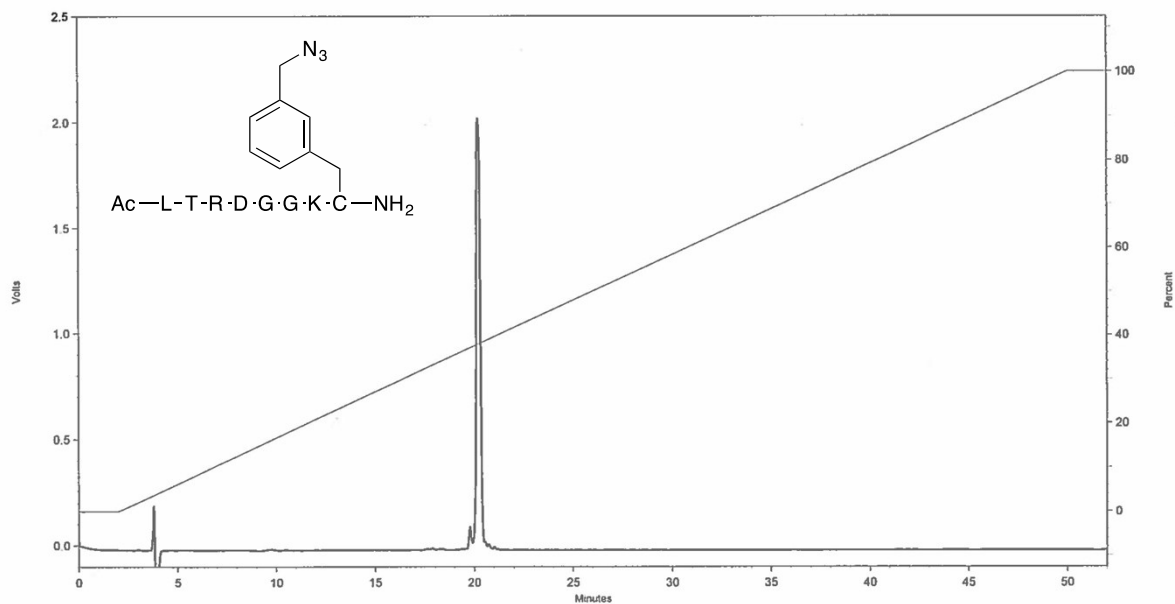

Linear peptide **20** (H-INMWQEVGKAC-NH<sub>2</sub>) 95 mg (34 μmol) 27%, (24 steps, average 95% per step) Exact mass calculated [M + H]<sup>+</sup>: 1422.6775; ESI-TOF MS found: 1422.6839. Rt = 27.89 min

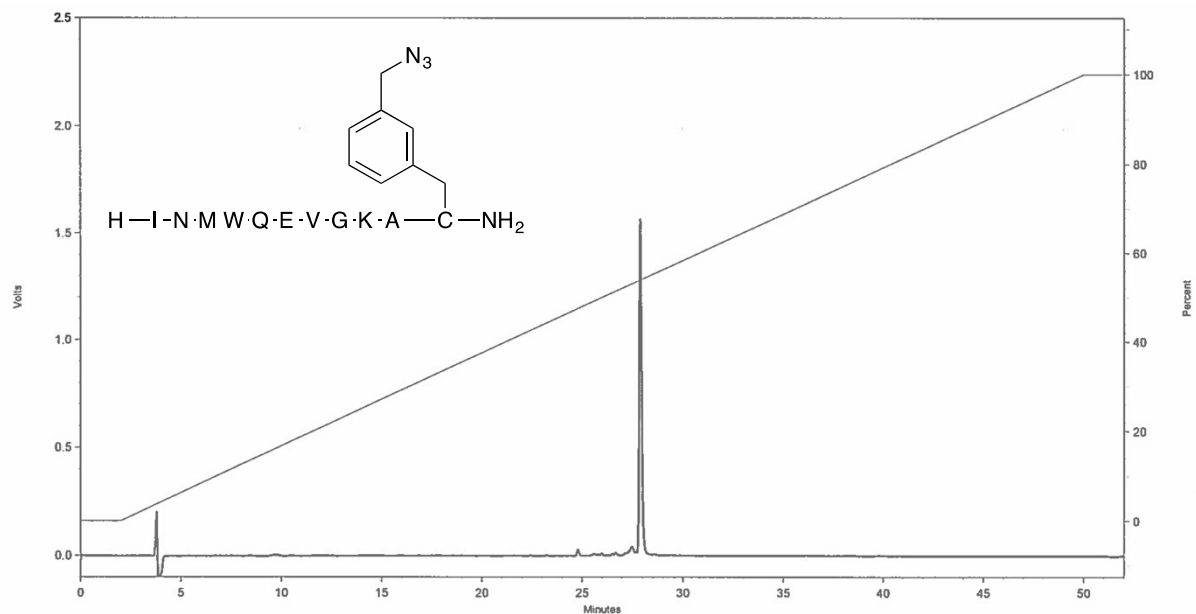

Linear peptide **21** (Ac-SGGDPEIVTC-NH<sub>2</sub>) 52 mg (44 μmol) 23%, (23 steps, average 94% per step) Exact mass calculated [M + H]<sup>+</sup>: 1163.5155; ESI-TOF MS found: 1163.5139. Rt = 24.12 min

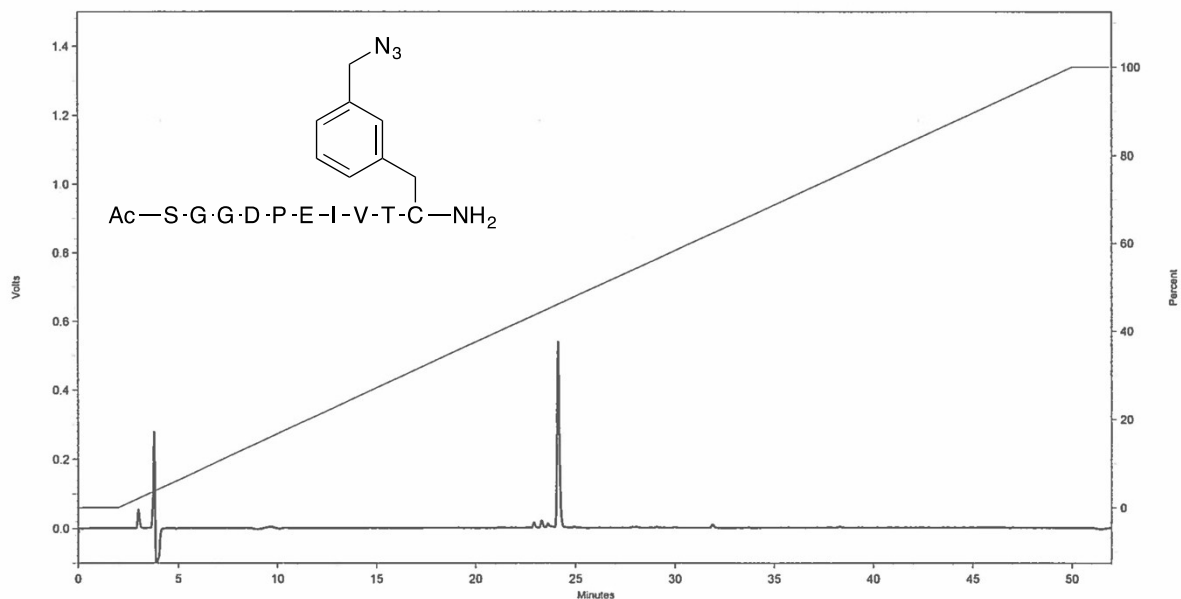

## Analytical data for constructs

### Constructs bearing one peptide and a free alkyne 22a-d

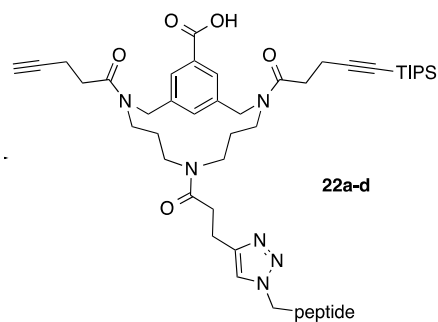

**22a** Peptide **16** (12.7  $\mu\text{mol}$  scale) yield: 11.5 mg (6.3  $\mu\text{mol}$ ) 50%, Exact mass calculated  $[\text{M} + 2\text{H}]^{2+}$ : 912.4620; ESI-TOF MS found: 912.4684. Rt = 30.42 min

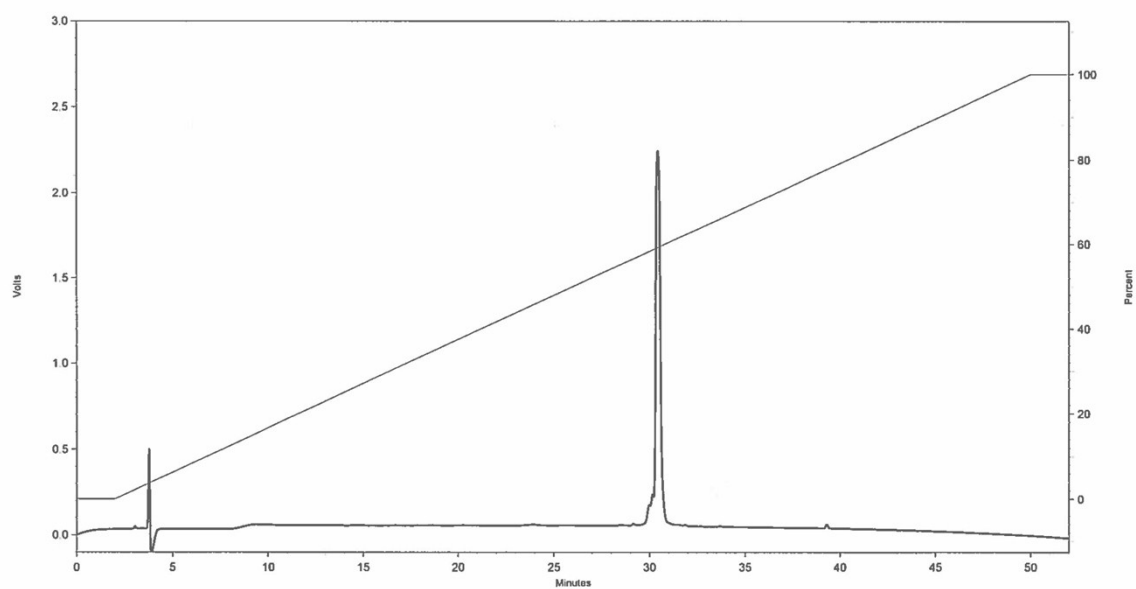

**22b** Peptide **17** (5  $\mu\text{mol}$  scale) 5.0 mg (2.3  $\mu\text{mol}$ ) 45%, Exact mass calculated  $[\text{M} + 2\text{H}]^{2+}$ : 1106.0428; ESI-TOF MS found: 1106.0408. RT = 31.14 min

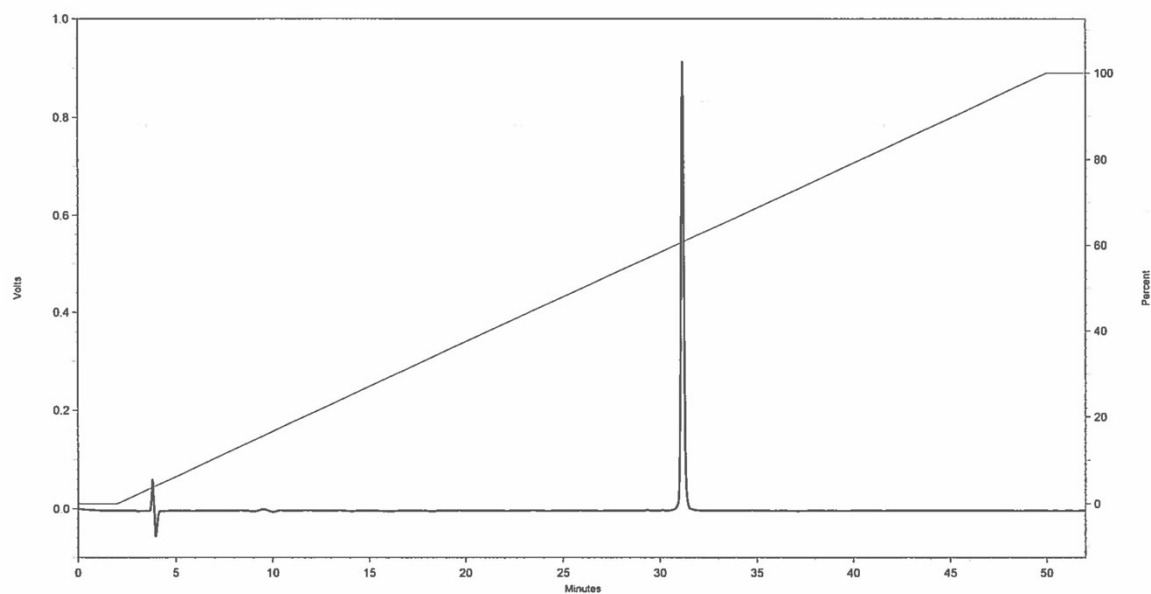

**22c** Peptide **18** (10  $\mu\text{mol}$  scale) yield: 13 mg (6.7  $\mu\text{mol}$ ) 67%, Exact mass calculated  $[\text{M} + 2\text{H}]^{2+}$ : 976.4618; ESI-TOF MS found: 976.4619. Rt = 34.54 min

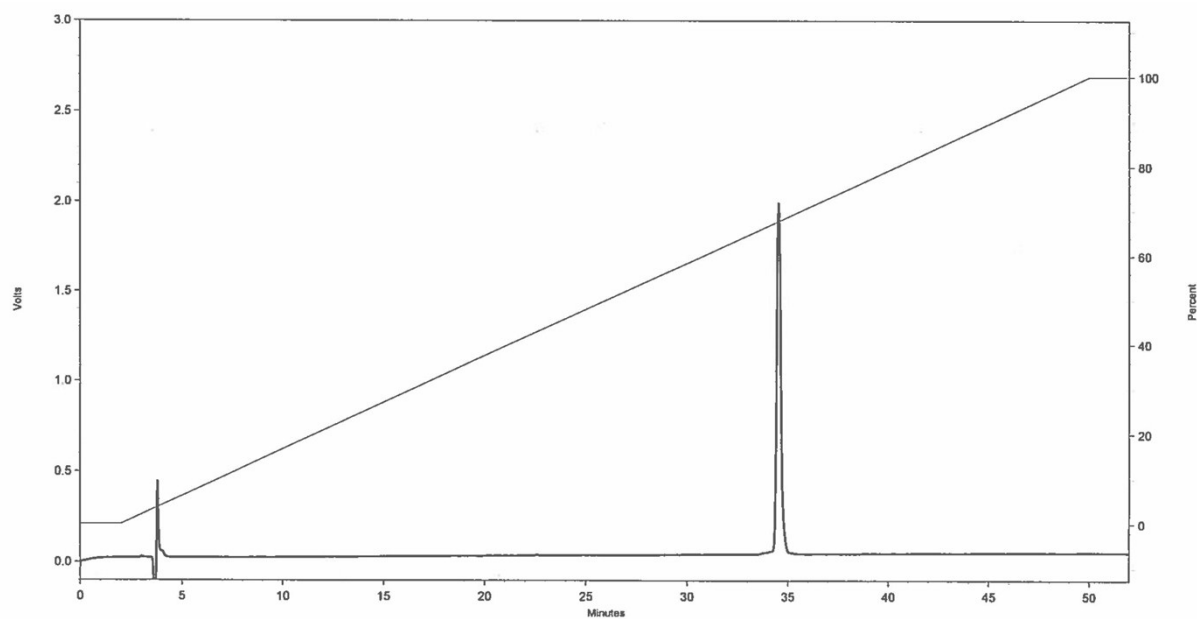

**22d** Peptide **19** (12.7  $\mu\text{mol}$  scale) yield: 11.8 mg (6.9  $\mu\text{mol}$ ) 54%, Exact mass calculated  $[\text{M} + \text{H}]^{+}$ : 1708,9069; ESI-TOF MS found: 1708,9070. Rt = 30.91 min

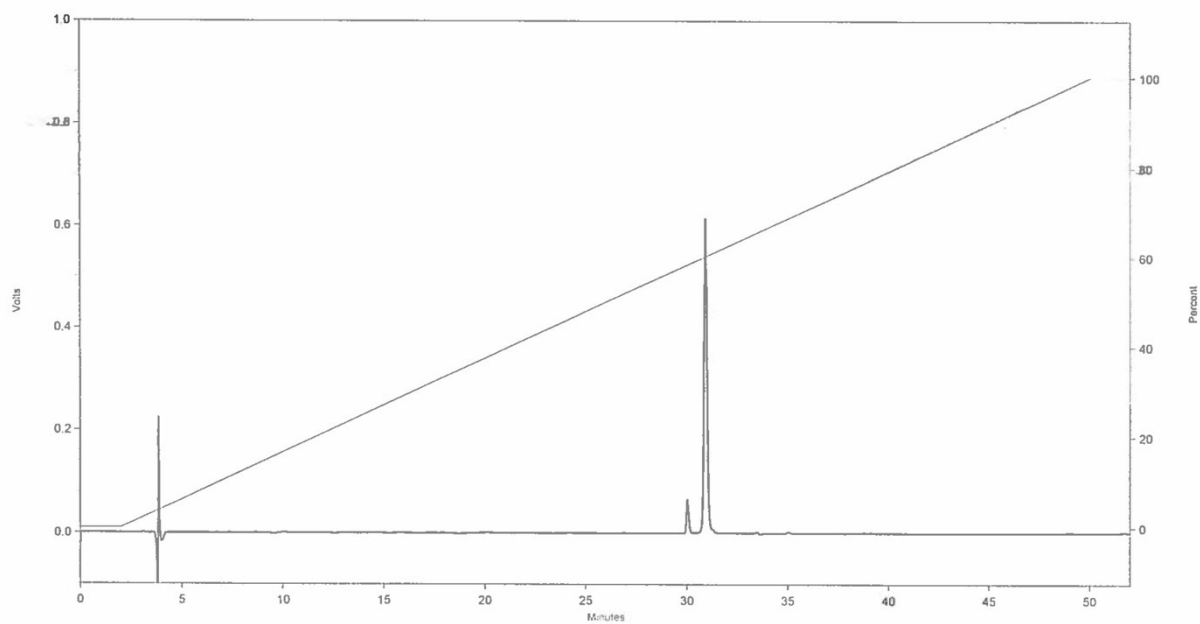

### Constructs bearing two peptides and one protected alkyne (23a-d)

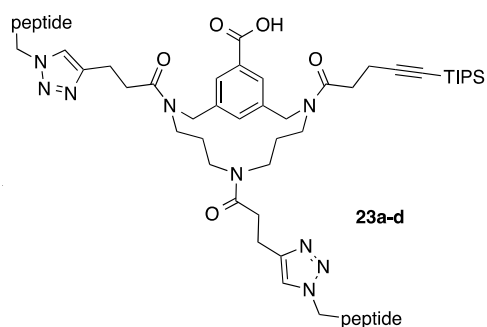

**23a** Peptide **18** (contains peptide **16** and **18** ligated in that order) (3.3  $\mu\text{mol}$  scale) yield: 2.5 mg (2.6  $\mu\text{mol}$ ) 80%, Exact mass calculated  $[M + 3H]^{3+}$ : 1034.4829; ESI-TOF MS found: 1034.4842. Rt = 27.95 min

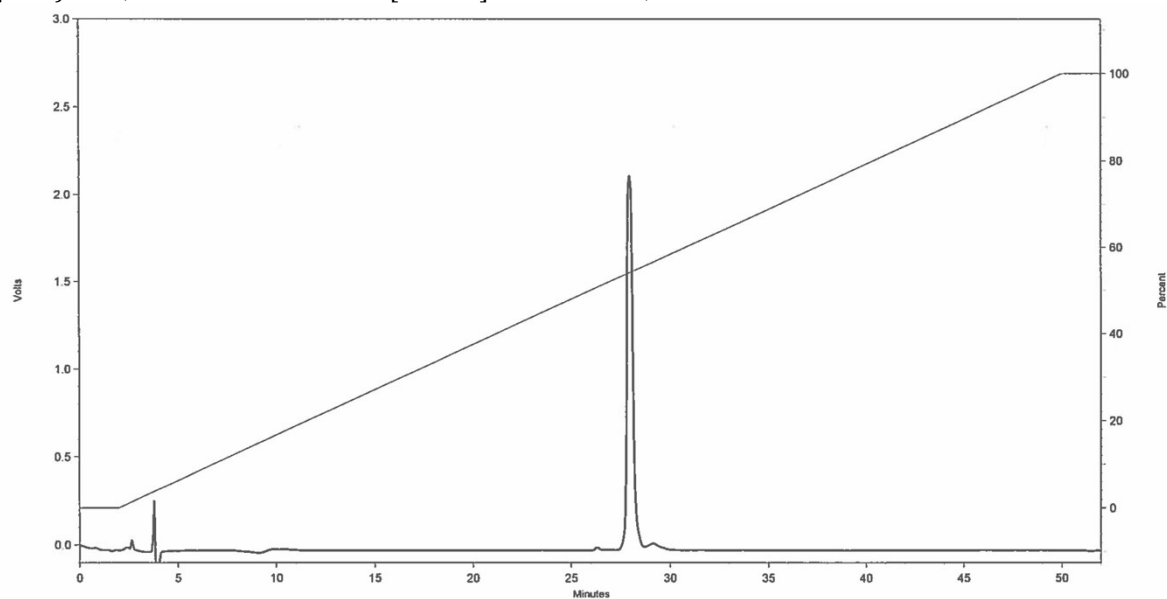

**23b** Peptide **18** (contains peptide **17** and **18** ligated in that order) (2.0  $\mu\text{mol}$  scale) 4.5 mg (1.3  $\mu\text{mol}$ ) 63%, Exact mass calculated  $[M + 2H]^{2+}$ : 1744.8012; ESI-TOF MS found: 1744.7973. Rt = 28.89 min

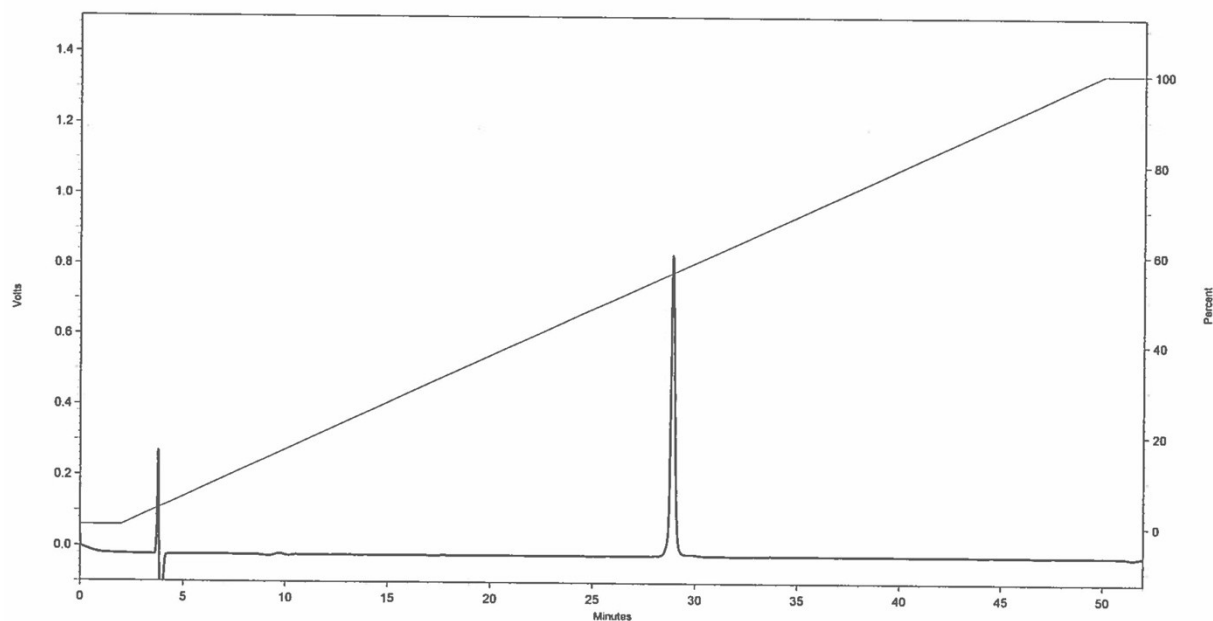

**23c** Peptide **16** (contains peptide **18** and **16** ligated in that order) (5.0  $\mu\text{mol}$  scale) yield: 13 mg (4.2  $\mu\text{mol}$ )  
84%, Exact mass calculated  $[\text{M} + 2\text{H}]^{2+}$ : 1551.2204; ESI-TOF MS found: 1551.2168. Rt = 28.03 min

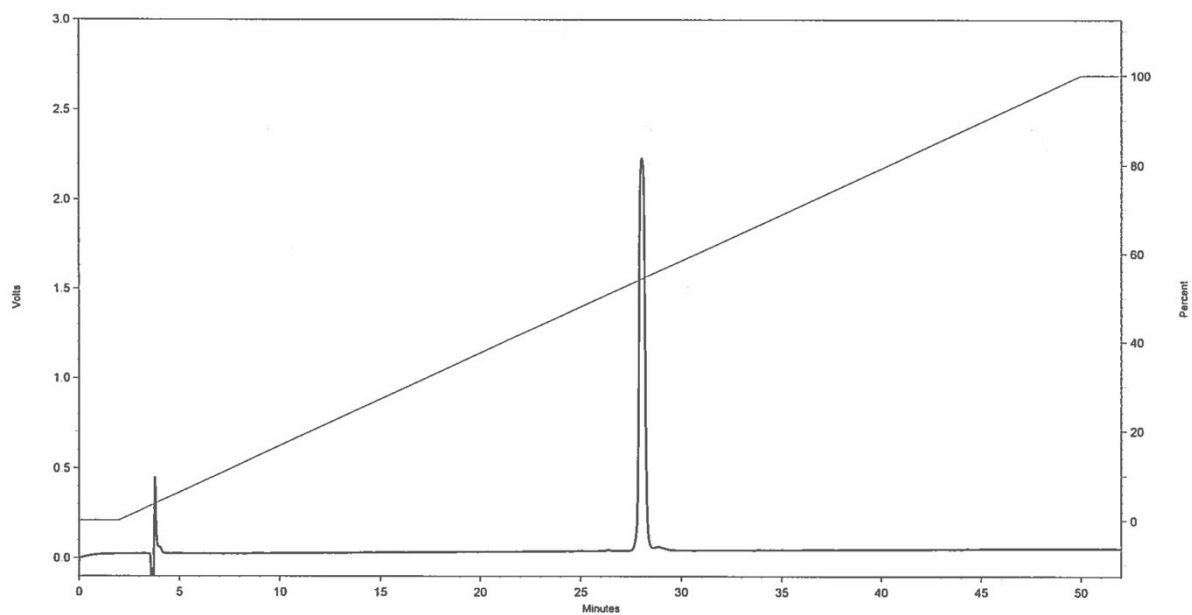

**23d** Peptide **21** (contains peptide **19** and **21** ligated in that order) (6.9  $\mu\text{mol}$  scale) yield: 12 mg (4.2  $\mu\text{mol}$ )  
61%, Exact mass calculated  $[\text{M} + 3\text{H}]^{3+}$ : 957,8101; ESI-TOF MS found: 957,8010. Rt = 28.38 min

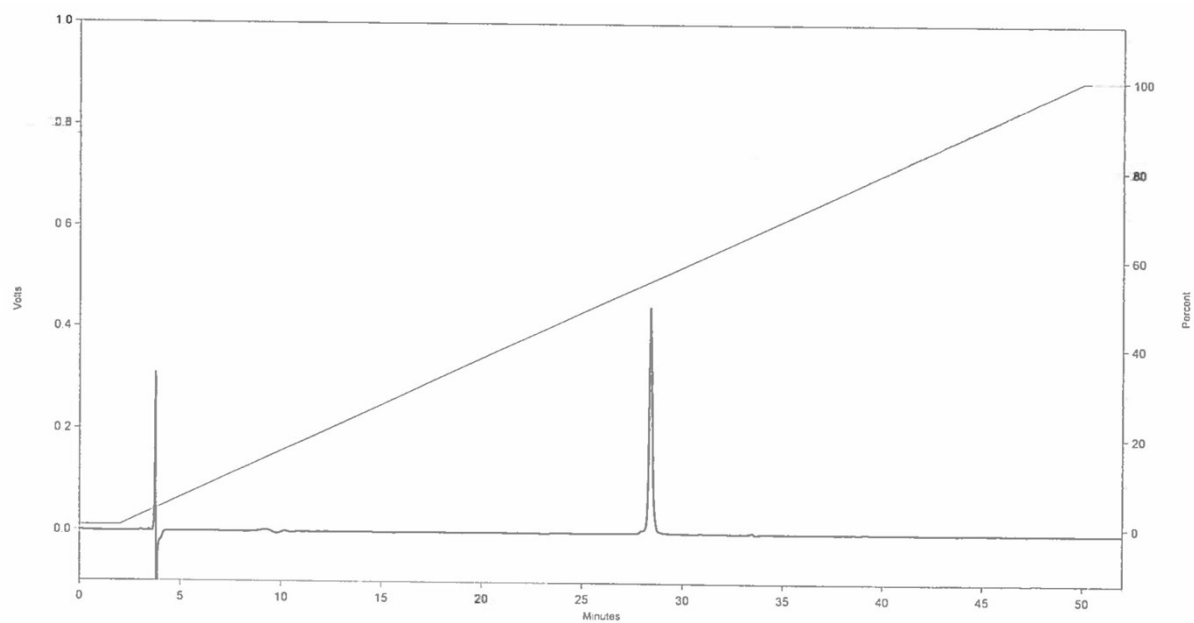



### Constructs bearing two peptides and a free alkyne (24a-d)

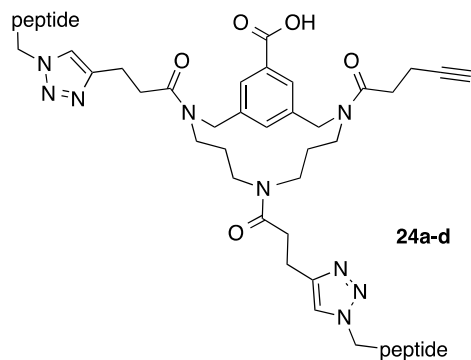

**24a** (contains peptide **16** and **18** ligated in that order) (2.8  $\mu\text{mol}$  scale) yield: 7.3 mg (2.5  $\mu\text{mol}$ ) 87%,  
Exact mass calculated  $[M + 2H]^{2+}$ : 1473.1537; ESI-TOF MS found: 1473.1494. Rt = 21.03 min

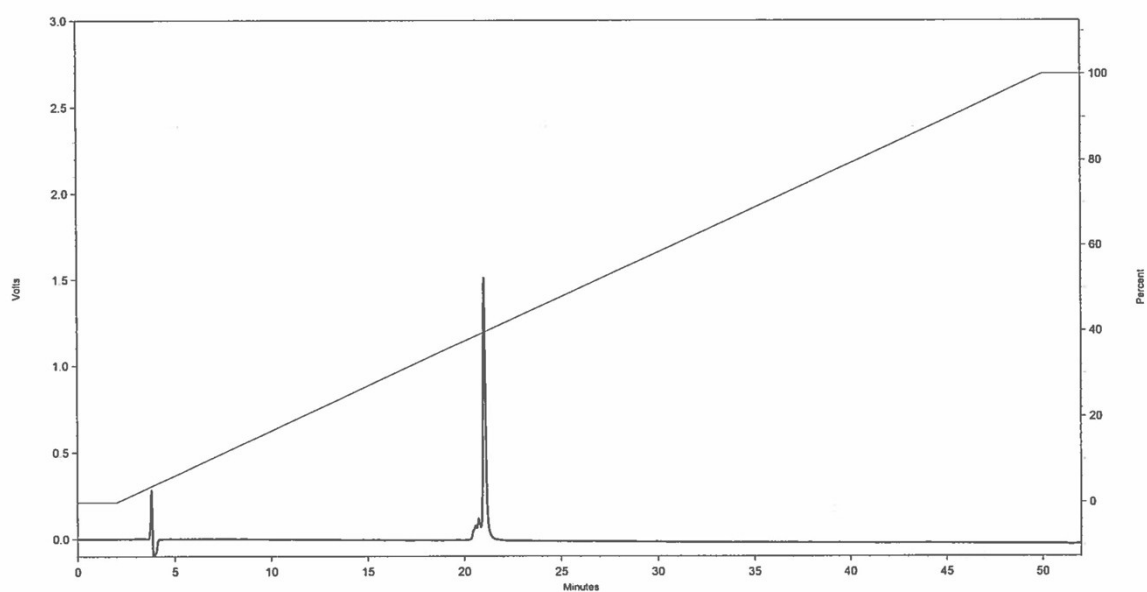

**24b** (contains peptide **17** and **18** ligated in that order) (1.2  $\mu\text{mol}$  scale) yield: 3.0 mg (0.9  $\mu\text{mol}$ ) 78%,  
Exact mass calculated  $[M + 2H]^{2+}$ : 1666.7345; ESI-TOF MS found: 1666.7269. Rt = 21.37 min

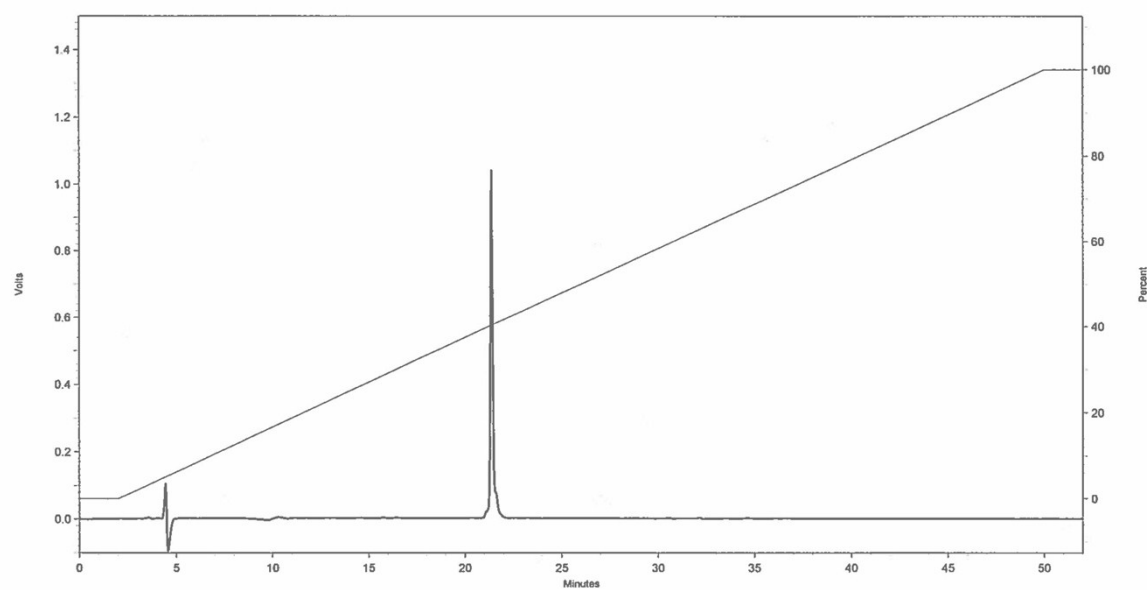

**24c** (contains peptide **18** and **16** ligated in that order) (3.6  $\mu\text{mol}$  scale) yield: 4.6 mg (1.6  $\mu\text{mol}$ ) 43%,  
Exact mass calculated  $[\text{M} + 2\text{H}]^{2+}$ : 1473.1537; ESI-TOF MS found: 1473.1518. Rt = 21.03 min

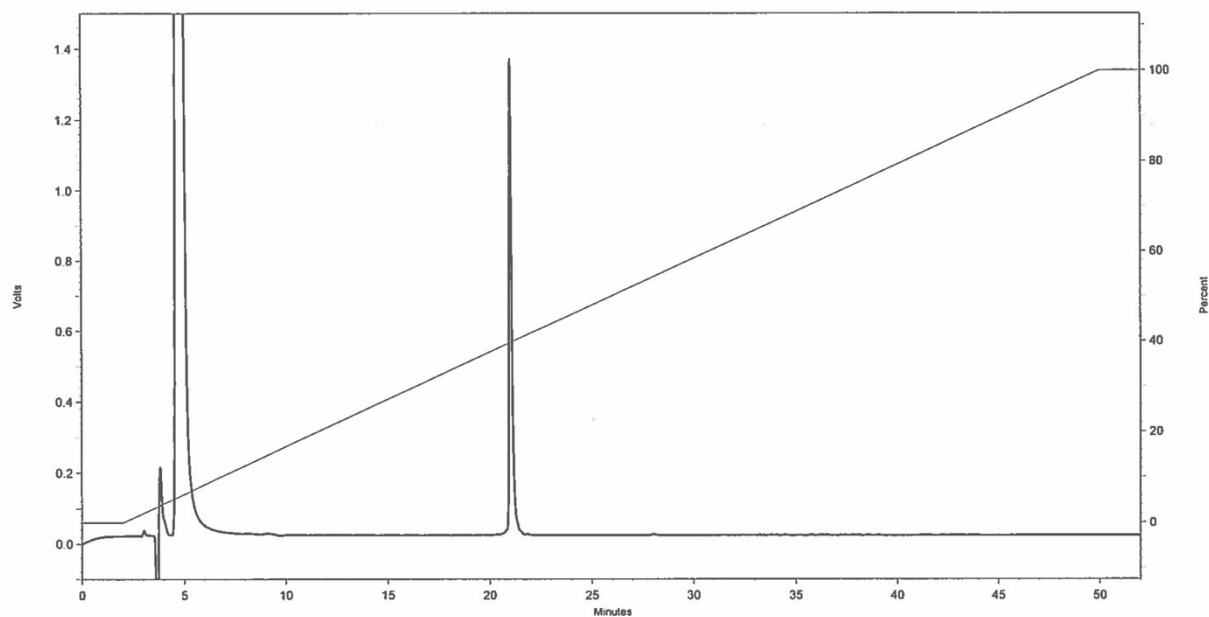

**24d** (contains peptide **19** and **21** ligated in that order) (4.2  $\mu\text{mol}$  scale) yield: 9.7 mg (3.6  $\mu\text{mol}$ ) 85%,  
Exact mass calculated  $[\text{M} + 2\text{H}]^{2+}$ : 1358,1445; ESI-TOF MS found: 1358,1403. Rt = 21.47 min

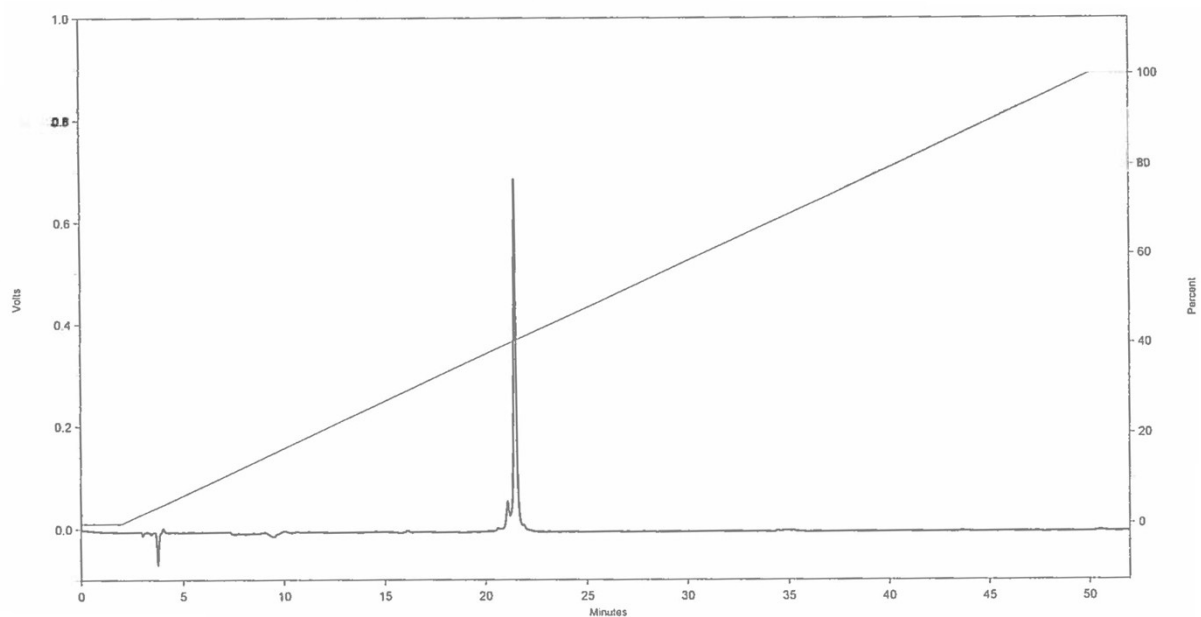

### Final constructs bearing three peptides (25a-e)

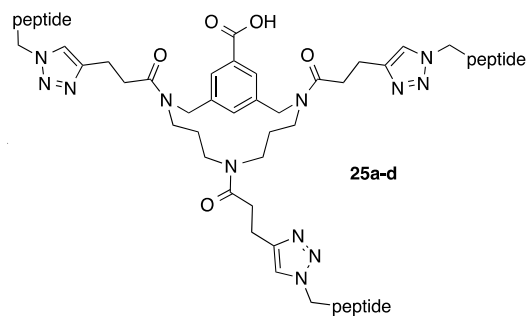

**25a** Peptide **17** (contains peptide **16**, **18** and **17** ligated in that order) (2.5  $\mu\text{mol}$  scale) yield: 4.9 mg (1.1  $\mu\text{mol}$ ) 44%, Exact mass calculated  $[M + 3H]^{3+}$ : 1034.4829; ESI-TOF MS found: 1034.4842. Rt = 20.72 min

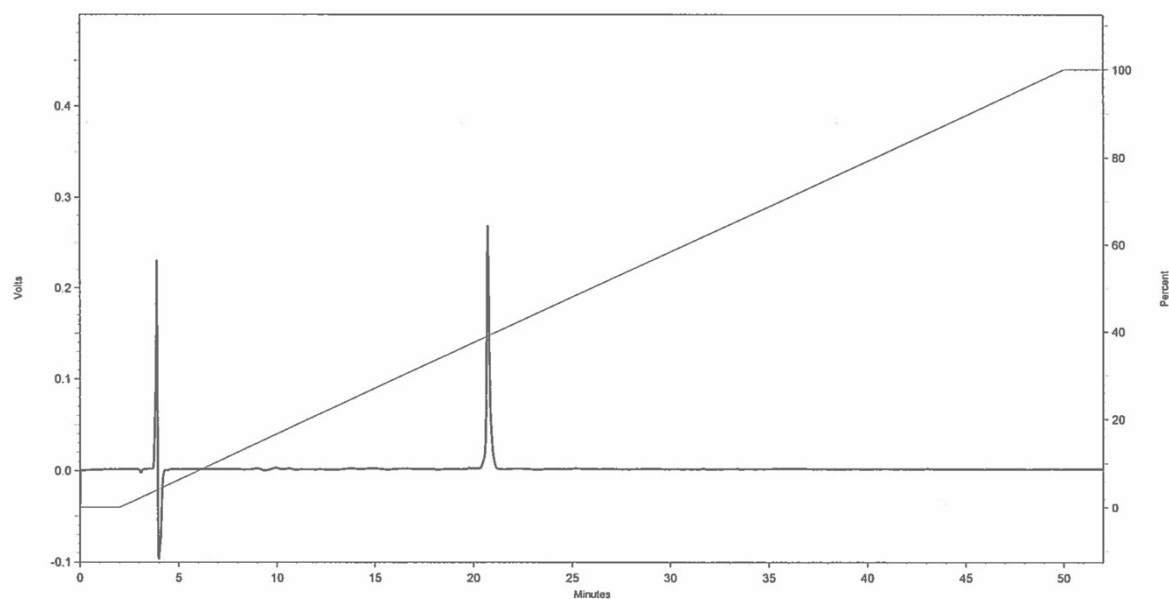

**25b** Peptide **16** (contains peptide **17**, **18** and **16** ligated in that order) (0.75  $\mu\text{mol}$  scale) yield: 1.7 mg (0.38  $\mu\text{mol}$ ) 51%, Exact mass calculated  $[M + 2H]^{2+}$ : 1744.8012; ESI-TOF MS found: 1744.7973. Rt = 20.85 min

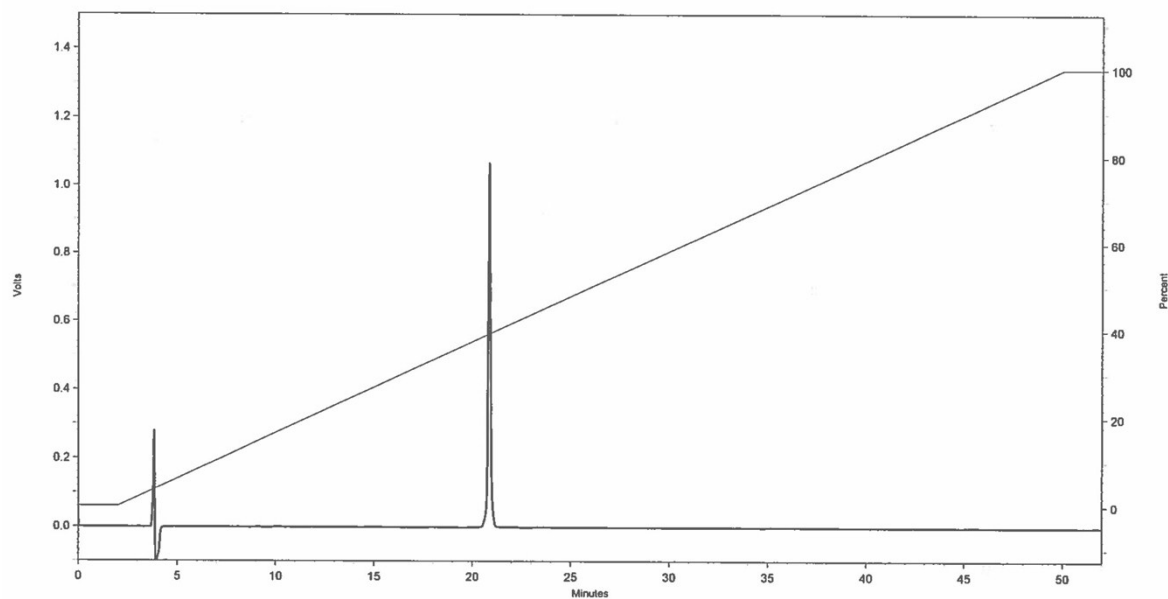

**25c** Peptide **17** (contains peptide **18**, **16** and **17** ligated in that order) (1.4  $\mu\text{mol}$  scale) yield: 3.6 mg (0.8  $\mu\text{mol}$ ), 59% 4351 Exact mass calculated  $[\text{M} + 2\text{H}]^{2+}$ : 1551.2204; ESI-TOF MS found: 1551.2168. Rt = 20.89 min

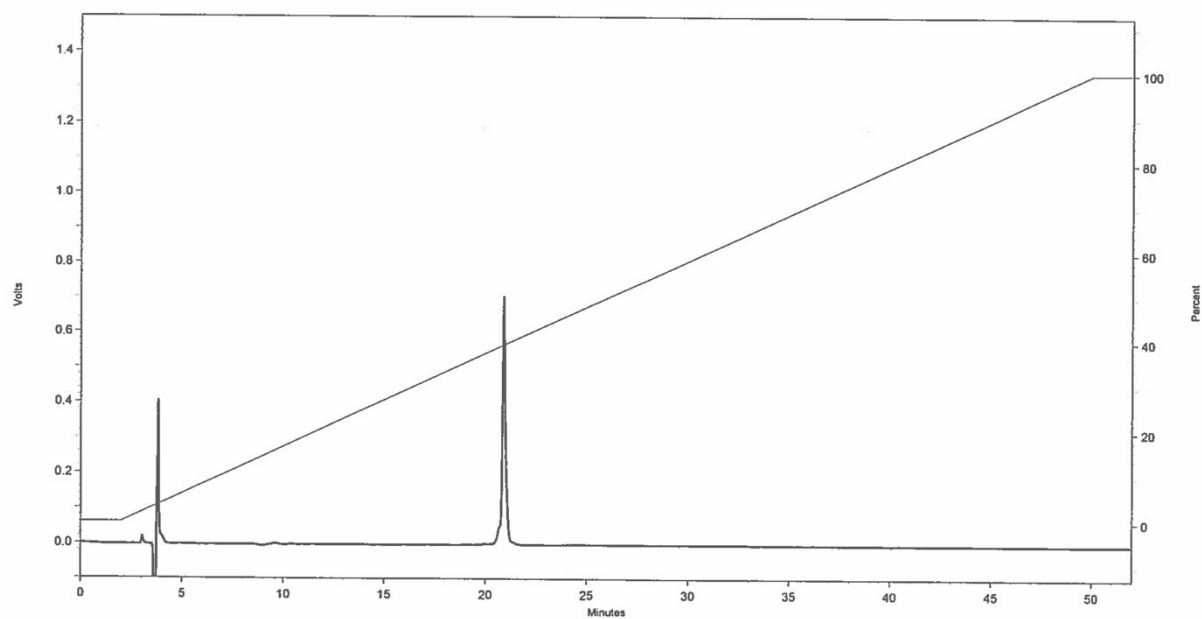

**25d** Peptide **20** (contains peptide **19**, **21** and **20** ligated in that order) (1.5  $\mu\text{mol}$  scale) yield: 2.2 mg (0.54  $\mu\text{mol}$ ) 36%, Exact mass calculated  $[\text{M} + 3\text{H}]^{3+}$ : 1379,6555; ESI-TOF MS found: 1379,6620. Rt = 23.41 min

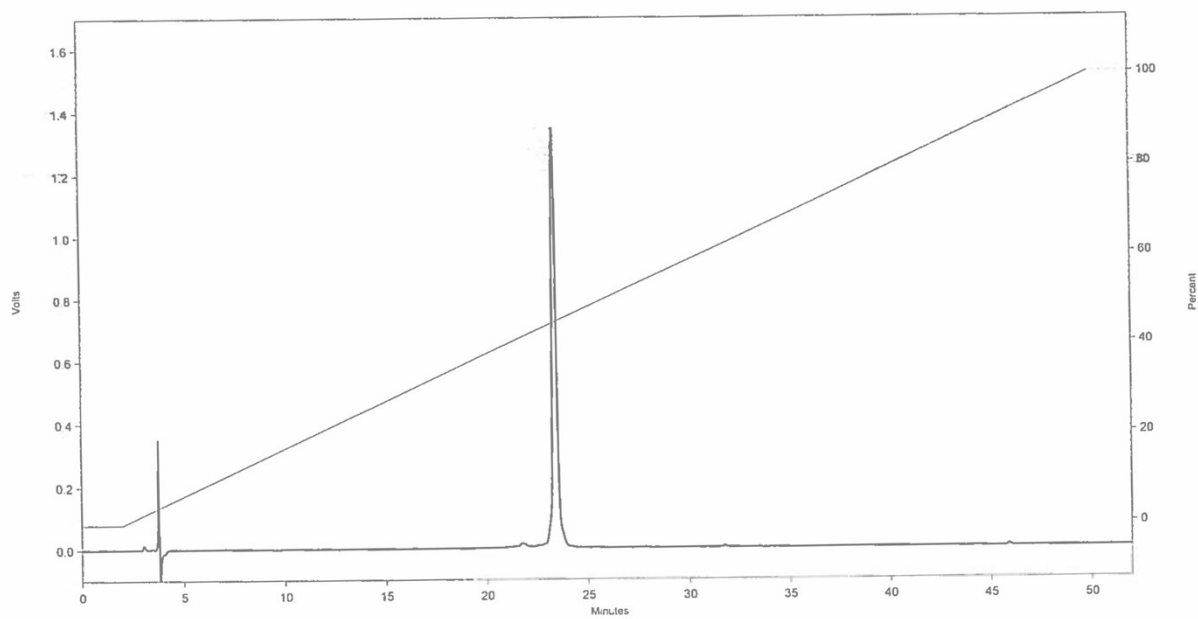

Supplement: c5ob02014j1.pdf [file c5ob02014j1.pdf]
